# Supplementary material
Source: MDPI journal article supplement (https://www.mdpi.com/2071-1050/15/4/3495)
Supplement: s1 [file s1]

---

## **Risk Assessment and Spatial Distribution of Heavy Metals with an Emphasis on Antimony (Sb) in Urban Soil in Bojnourd, Iran**

Abdulmannan Rouhani<sup>1\*</sup>, Mohsen Makki<sup>2</sup>, Michal Hejzman<sup>3</sup>, Razieh Shirzad<sup>4</sup>, Mariusz Z. Gusiatin<sup>5</sup>

- 1- \* Department of Environment, Faculty of Environment, the University of Jan Evangelista in Ústí nad Labem (UJEP), Ústí nad Labem, Czech Republic. <https://orcid.org/0000-0002-1964-1970>, corresponding author
- 2- Geography Department, Humboldt-Universität zu Berlin, Unter den Linden 6, 10099 Berlin, Germany
- 3- Department of Environment, Faculty of Environment, the University of Jan Evangelista in Ústí nad Labem (UJEP), Ústí nad Labem, Czech Republic.
- 4- Department of Forestry, Faculty of Natural Resources, University of Tehran, Tehran, Iran
- 5- Department of Environmental Biotechnology, Faculty of Geoengineering, University of Warmia and Mazury in Olsztyn, Poland

Corresponding email: \* [a.rohani70@gmail.com](mailto:a.rohani70@gmail.com)

---

## **Supplementary Material**

**Table S1 Values of factors used in the risk assessment formulae.**

| Factors (units)              | Value                                        |          | References                       |
|------------------------------|----------------------------------------------|----------|----------------------------------|
|                              | Adult                                        | Children |                                  |
| IngR (mg day <sup>-1</sup> ) | 100                                          | 200      | (USEPA, 2011)                    |
| EF (days yr <sup>-1</sup> )  | 350                                          | 350      | (RAIS, 2017; US EPA, 2002)       |
| ED (yrs)                     | 30                                           | 6        | (US EPA, 2002)                   |
| BW (kg)                      | 70                                           | 15       | (US EPA, 2002; USEPA, 2001)      |
| AT (days)                    | 10 950                                       | 2190     | (Man et al., 2010; US EPA, 2002) |
| SA (cm <sup>2</sup> )        | 5700                                         | 2800     | (US EPA, 2002)                   |
| AF (mg cm <sup>-2</sup> )    | 0.07                                         | 0.2      | (RAIS, 2017; US EPA, 2002)       |
| InhR (m <sup>3</sup> /day)   | 20                                           | 7.6      | (USEPA, 1989)                    |
| CF (kg·mg <sup>-1</sup> )    | 10 <sup>-6</sup>                             |          | (USEPA, 1989, 1997)              |
| ABS                          | ABS = 0.03 for As; ABS = 0.001 for other HMs |          | (RAIS, 2017; RSL, 2017)          |
| PEF (m <sup>3</sup> /kg)     | 1.36 × 10 <sup>9</sup>                       |          | (US EPA, 2002)                   |

**Table S2 Reference dose (RfD) and slope factor (SF) of heavy metals for health risk assessment.**

| Element | Oral RfD | Dermal RfD | RfD Inhalation | Oral SF | Dermal SF | Inhalation SF | Reference                                           |
|---------|----------|------------|----------------|---------|-----------|---------------|-----------------------------------------------------|
| Cd      | 0.001    | 0.00001    | 5.71E-05       | 6.1     | 6.1       | 6.3           | (USEPA, 2012; Cheng et al., 2018)                   |
| Pb      | 0.0035   | 0.000525   | 0.00352        | 0.0085  | 8.5E-06   | 0.042         | (USEPA, 2012; Jiang et al., 2017)                   |
| Sb      | 0.0004   | -          | -              | -       | -         | -             | (USEPA, 2001, 2020)                                 |
| Cr      | 0.003    | 0.00006    | 0.0000286      | 0.5     | 20        | 42            | (USEPA, 2012; Jiang et al., 2017; Cao et al., 2015) |
| As      | 0.0003   | 0.000123   | 0.0003         | 1.5     | 3.66      | 15            | (USEPA, 2001)                                       |
| Ni      | 0.02     | 0.0054     | 0.026          | 0.91    | 42.5      | 0.84          | (Cao et al., 2015; USEPA, 2020)                     |
| Hg      | 0.0003   | 2.10E-05   | 0.0000857      | -       | -         | -             | (De Miguel et al., 2007; Penteado et al., 2021)     |

**Table S3 Heavy metal average daily dose (ADD) by oral, dermal and inhalation exposure routes among children and adults.**

| Heavy Meta | Land type | Adult             |                    |                       | Children           |                    |                       |
|------------|-----------|-------------------|--------------------|-----------------------|--------------------|--------------------|-----------------------|
|            |           | ADD <sub>ng</sub> | ADD <sub>inh</sub> | ADD <sub>dermal</sub> | ADD <sub>ing</sub> | ADD <sub>inh</sub> | ADD <sub>dermal</sub> |
| Sb         | TA        | 6.47E-06          | 7.29E-10           | 2.58E-08              | 6.03E-05           | 5.54E-11           | 1.69E-07              |
|            | RA        | 2.45E-06          | 2.76E-10           | 9.78E-09              | 2.29E-05           | 2.1E-11            | 6.41E-08              |
|            | SA        | 1.26E-06          | 1.42E-10           | 5.03E-09              | 1.18E-05           | 1.08E-11           | 3.29E-08              |
| Cd         | TA        | 3.79E-06          | 4.28E-10           | 1.51E-08              | 3.54E-05           | 3.25E-11           | 9.92E-08              |
|            | RA        | 2.75E-06          | 3.1E-10            | 1.1E-08               | 2.57E-05           | 2.36E-11           | 7.2E-08               |
|            | SA        | 1.99E-06          | 2.24E-10           | 7.93E-09              | 1.85E-05           | 1.7E-11            | 5.19E-08              |
| Cr         | TA        | 8.09E-05          | 9.12E-09           | 3.23E-07              | 7.55E-04           | 6.93E-10           | 2.11E-06              |
|            | RA        | 6.43E-05          | 7.25E-09           | 2.57E-07              | 6.01E-04           | 5.51E-10           | 1.68E-06              |
|            | SA        | 0.000054          | 6.09E-09           | 2.15E-07              | 5.04E-04           | 4.63E-10           | 1.41E-06              |
| Pb         | TA        | 3.65E-05          | 4.12E-09           | 1.46E-07              | 3.41E-04           | 3.13E-10           | 9.55E-07              |
|            | RA        | 1.94E-05          | 2.19E-09           | 7.74E-08              | 1.81E-04           | 1.66E-10           | 5.07E-07              |
|            | SA        | 1.37E-05          | 1.55E-09           | 5.48E-08              | 1.28E-04           | 1.18E-10           | 3.59E-07              |
| As         | TA        | 1.43E-05          | 2.1E-15            | 4.87E-06              | 0.000133           | 3.72E-15           | 3.91E-06              |
|            | RA        | 1.48E-05          | 2.18E-15           | 5.07E-06              | 0.000138           | 3.86E-15           | 4.07E-06              |
|            | SA        | 2.07E-05          | 3.04E-15           | 7.07E-06              | 0.000193           | 5.39E-15           | 5.68E-06              |
| Ni         | TA        | 3.71E-05          | 5.45E-15           | 4.22E-07              | 0.000346           | 9.66E-15           | 3.39E-07              |
|            | RA        | 2.51E-05          | 3.69E-15           | 2.86E-07              | 0.000234           | 6.55E-15           | 2.3E-07               |
|            | SA        | 2.17E-05          | 3.19E-15           | 2.47E-07              | 0.000203           | 5.66E-15           | 1.99E-07              |
| Hg         | TA        | 1.62E-07          | 2.38E-17           | 1.85E-09              | 1.51E-06           | 4.23E-17           | 1.48E-09              |
|            | RA        | 4.44E-07          | 6.53E-17           | 5.06E-09              | 4.14E-06           | 1.16E-16           | 4.06E-09              |
|            | SA        | 5.28E-07          | 7.77E-17           | 6.02E-09              | 4.93E-06           | 1.38E-16           | 4.83E-09              |

## References

- De Miguel, E., Iribarren, I., Chacón, E., Ordóñez, A., & Charlesworth, S. (2007). Risk-based evaluation of the exposure of children to trace elements in playgrounds in Madrid (Spain). *Chemosphere*, 66 3, 505-13. <https://doi.org/10.1016/j.chemosphere.2006.05.065>
- Cao, S., Duan, X., Zhao, X., Wang, B., Ma, J., Fan, D., Sun, C., He, B., Wei, F., Jiang, G., 2015. Health risk assessment of various metal(loid)s via multiple exposure pathways on children living near a typical lead-acid battery plant, China. *Environmental pollution*, 200, 16-23. <https://doi.org/10.1016/j.envpol.2015.02.010>.

Cheng, Z., Chen, L., Li, H., Lin, J., Yang, Z., Yang, Y., Xu, X., Xian, J., Shao, J., Zhu, X., 2018. Characteristics and health risk assessment of heavy metals exposure via household dust from urban area in Chengdu, China. *The Science of the total environment*, 619-620, 621-629. <https://doi.org/10.1016/j.scitotenv.2017.11.144>.

Jiang, Y., Chao, S., Liu, J., Yang, Y., Chen, Y., Zhang, A., Cao, H., 2017. Source apportionment and health risk assessment of heavy metals in soil for a township in Jiangsu Province, China. *Chemosphere*, 168, 1658-1668. <https://doi.org/10.1016/j.chemosphere.2016.11.088>.

Man, Y.B., Sun, X.L., Zhao, Y.G., Lopez, B.N., Chung, S.S., Wu, S.C., Cheung, K.C., Wong, M.H., 2010. Health risk assessment of abandoned agricultural soils based on heavy metal contents in Hong Kong, the world's most populated city. *Environ. Int.* 36, 570–576. <https://doi.org/10.1016/j.envint.2010.04.014>.

Timofeev, I.V.; Kosheleva, N.E.; Kasimov, N.S. Health risk assessment based on the contents of potentially toxic elements in urban soils of Darkhan, Mongolia. *J. Environ. Manag.* 2019, 242, 279–289. <https://doi.org/10.1016/j.jenvman.2019.04.090>

USEPA, 1989. Risk assessment guidance for superfund volume I human health evaluation manual (Part A). Off. Emerg. Remedial Response 1, 1–291. <https://doi.org/EPA/540/1-89/002>.

USEPA, 2001. Supplemental Guidance for Developing Soil Screening Levels for Superfund Sites. US Environmental Protection Agency, Washington, DC, USA.

USEPA, 2002. Supplemental Guidance for Developing Soil Screening Levels for Superfund Sites, vol. 106 U.S. Environ. Prot. Agency.

USEPA, 2012. Integrated Risk Information System of the US Environmental Protection Agency.

USEPA, 2020. Regional Screening Level (RSL) Resident Soil Table (TR=1E-06, HQ=1) May 718 2020 (corrected). US Environmental Protection Agency, 2020. Available at: 719 <https://semspub.epa.gov/work/HQ/200047.pdf>. (accessed 09 October 2020).

Penteado, J.O., Brum, R.D., Ramires, P.F., Garcia, E.M., dos Santos, M.T., & da Silva Júnior, F.M. (2021). Health risk assessment in urban parks soils contaminated by metals, Rio Grande city (Brazil) case study. *Ecotoxicology and environmental safety*, 208, 111737. <https://doi.org/10.1016/j.ecoenv.2020.111737>
